# Supplementary material
Source: publisher site journal article supplement (https://static.cambridge.org/content/id/urn:cambridge.org:id:article:S0043887115000192/resource/name/S0043887115000192_supp_mat.pdf)
Supplement: Supplementary file 1 [file S0043887115000192_supp_mat.pdf]

Democracy, Elite Bias, and Financial Development in Latin America  
By Victor Menaldo and Daniel Yoo

Supplementary Appendix

## Supplementary Appendix Table 1, Jackknife Panel Regressions using Liquidity

Panel regressions estimated using Driscoll Kraay Standard Errors

| Country Omitted     | Democracy with Autocratic Constitution<br>(Dem w/ Aut Const vs. Dem w/ Dem Const ) |         |        |        | Democracy + Amend Constitution<br>(Dem w/ Dem Const vs. Aut) |         |        |        | Dem. + Amend Const. + Democracy with Autocratic Const.<br>(Dem w/ Aut Const vs. Aut) |         |        |       |
|---------------------|------------------------------------------------------------------------------------|---------|--------|--------|--------------------------------------------------------------|---------|--------|--------|--------------------------------------------------------------------------------------|---------|--------|-------|
|                     | Coefficient                                                                        | p-value | 95% CI |        | Coefficient                                                  | p-value | 95% CI |        | Coefficient                                                                          | p-value | 95% CI |       |
| Argentina           | -6.822                                                                             | 0.00    | -9.807 | -3.836 | 10.586                                                       | 0.00    | 7.644  | 13.529 | 3.765                                                                                | 0.00    | 2.337  | 5.192 |
| Bolivia             | -0.546                                                                             | 0.73    | -3.711 | 2.618  | 3.458                                                        | 0.05    | 0.089  | 6.827  | 2.912                                                                                | 0.00    | 1.286  | 4.537 |
| Brazil              | -1.941                                                                             | 0.14    | -4.563 | 0.681  | 5.995                                                        | 0.00    | 2.916  | 9.073  | 4.054                                                                                | 0.00    | 2.435  | 5.673 |
| Chile               | -2.877                                                                             | 0.06    | -5.823 | 0.069  | 7.053                                                        | 0.00    | 4.133  | 9.973  | 4.176                                                                                | 0.00    | 2.413  | 5.938 |
| Colombia            | -2.244                                                                             | 0.13    | -5.134 | 0.647  | 6.522                                                        | 0.00    | 3.593  | 9.452  | 4.279                                                                                | 0.00    | 2.563  | 5.995 |
| Costa Rica          | -2.057                                                                             | 0.13    | -4.801 | 0.688  | 4.994                                                        | 0.00    | 2.119  | 7.869  | 2.937                                                                                | 0.00    | 1.384  | 4.491 |
| Dominican Republic  | -3.069                                                                             | 0.03    | -5.888 | -0.250 | 6.600                                                        | 0.00    | 3.497  | 9.703  | 3.531                                                                                | 0.00    | 1.913  | 5.149 |
| Ecuador             | -3.053                                                                             | 0.08    | -6.495 | 0.389  | 6.708                                                        | 0.00    | 3.154  | 10.262 | 3.655                                                                                | 0.00    | 1.846  | 5.424 |
| El Salvador         | -5.140                                                                             | 0.00    | -8.342 | -1.938 | 8.562                                                        | 0.00    | 5.389  | 11.734 | 3.422                                                                                | 0.00    | 1.637  | 5.171 |
| Guatemala           | -4.169                                                                             | 0.00    | -6.813 | -1.524 | 8.277                                                        | 0.00    | 5.387  | 11.167 | 4.108                                                                                | 0.00    | 2.503  | 5.713 |
| Guyana              | -3.068                                                                             | 0.03    | -5.796 | -9.341 | 6.629                                                        | 0.00    | 3.747  | 9.510  | 3.560                                                                                | 0.00    | 1.966  | 5.155 |
| Haiti               | -3.079                                                                             | 0.03    | -5.814 | -0.345 | 6.578                                                        | 0.00    | 3.667  | 9.488  | 3.498                                                                                | 0.00    | 1.937  | 5.060 |
| Honduras            | -3.723                                                                             | 0.01    | -6.476 | -0.971 | 7.480                                                        | 0.00    | 4.422  | 10.538 | 3.756                                                                                | 0.00    | 2.077  | 5.436 |
| Jamaica             | -2.958                                                                             | 0.04    | -5.708 | -0.208 | 6.384                                                        | 0.00    | 3.543  | 9.224  | 3.426                                                                                | 0.00    | 1.905  | 4.947 |
| Mexico              | -3.058                                                                             | 0.03    | -5.844 | -0.273 | 6.274                                                        | 0.00    | 2.986  | 9.562  | 3.216                                                                                | 0.00    | 1.272  | 5.160 |
| Nicaragua           | -3.074                                                                             | 0.03    | -5.804 | -0.345 | 6.536                                                        | 0.00    | 3.630  | 9.442  | 3.462                                                                                | 0.00    | 1.885  | 5.039 |
| Panama              | -2.599                                                                             | 0.06    | -5.262 | 0.064  | 4.723                                                        | 0.00    | 1.734  | 7.713  | 2.124                                                                                | 0.02    | 0.417  | 3.832 |
| Paraguay            | -1.994                                                                             | 0.17    | -4.860 | -0.972 | 5.222                                                        | 0.00    | 2.061  | 8.383  | 3.228                                                                                | 0.00    | 1.618  | 4.839 |
| Peru                | -2.073                                                                             | 0.18    | -5.128 | 0.983  | 5.814                                                        | 0.00    | 1.984  | 9.643  | 3.741                                                                                | 0.00    | 2.092  | 5.390 |
| Trinidad and Tobago | -3.989                                                                             | 0.01    | -6.783 | -1.172 | 6.909                                                        | 0.00    | 3.894  | 9.923  | 2.931                                                                                | 0.00    | 1.208  | 4.654 |
| Uruguay             | -2.756                                                                             | 0.05    | -5.449 | -0.063 | 6.135                                                        | 0.00    | 3.465  | 8.806  | 3.379                                                                                | 0.00    | 1.760  | 4.998 |
| Venezuela, RB       | -3.377                                                                             | 0.02    | -6.262 | -0.492 | 6.083                                                        | 0.00    | 3.061  | 9.106  | 2.706                                                                                | 0.00    | 1.339  | 4.074 |

Country fixed effects, year fixed effects and country specific time trends included across each regression. All control variables included in Table 2 regressions (see text) also included. None of these coefficients reported to conserve space.

## Supplementary Appendix Table 2, Jackknife Panel Regressions using Total Deposits

Panel regressions estimated using Driscoll Kraay Standard Errors

| Country Omitted     | Democracy with Autocratic Constitution<br>(Dem w/ Aut Const vs. Dem w/ Dem Const ) |         |        |        | Democracy + Amend Constitution<br>(Dem w/ Dem Const vs. Aut) |         |        |        | Dem.+ Amend Const. + Dem. with Autocratic Const.<br>(Dem w/ Aut Const vs. Aut) |         |        |       |
|---------------------|------------------------------------------------------------------------------------|---------|--------|--------|--------------------------------------------------------------|---------|--------|--------|--------------------------------------------------------------------------------|---------|--------|-------|
|                     | Coefficient                                                                        | p-value | 95% CI |        | Coefficient                                                  | p-value | 95% CI |        | Coefficient                                                                    | p-value | 95% CI |       |
| Argentina           | -5.166                                                                             | 0.01    | -8.795 | -1.538 | 8.098                                                        | 0.00    | 4.247  | 11.948 | 2.931                                                                          | 0.00    | 1.447  | 4.416 |
| Bolivia             | -0.526                                                                             | 0.77    | -4.130 | 3.077  | 2.699                                                        | 0.16    | -1.116 | 6.513  | 2.172                                                                          | 0.01    | 0.555  | 3.789 |
| Brazil              | -2.154                                                                             | 0.14    | -5.063 | 0.758  | 5.424                                                        | 0.00    | 2.022  | 8.826  | 3.272                                                                          | 0.00    | 1.583  | 4.960 |
| Chile               | -2.963                                                                             | 0.10    | -6.501 | 0.575  | 5.039                                                        | 0.01    | 1.505  | 8.573  | 2.076                                                                          | 0.01    | 0.481  | 3.671 |
| Colombia            | -0.768                                                                             | 0.61    | -3.778 | 2.241  | 4.794                                                        | 0.01    | 1.376  | 8.211  | 4.025                                                                          | 0.00    | 2.505  | 5.546 |
| Costa Rica          | -1.853                                                                             | 0.28    | -5.237 | 1.531  | 4.141                                                        | 0.03    | 0.514  | 7.768  | 2.288                                                                          | 0.00    | 0.782  | 3.794 |
| Dominican Republic  | -2.274                                                                             | 0.19    | -5.730 | 1.182  | 4.899                                                        | 0.01    | 1.144  | 8.655  | 2.625                                                                          | 0.00    | 1.095  | 4.156 |
| Ecuador             | -2.273                                                                             | 0.27    | -6.353 | 1.806  | 5.456                                                        | 0.01    | 1.361  | 9.551  | 3.183                                                                          | 0.00    | 1.520  | 4.846 |
| El Salvador         | -4.187                                                                             | 0.02    | -7.779 | -0.595 | 6.950                                                        | 0.00    | 3.090  | 10.811 | 2.763                                                                          | 0.00    | 1.071  | 4.455 |
| Guatemala           | -3.281                                                                             | 0.05    | -6.480 | -0.081 | 6.413                                                        | 0.00    | 2.931  | 9.895  | 3.132                                                                          | 0.00    | 1.496  | 4.767 |
| Guyana              | -2.542                                                                             | 0.13    | -5.856 | 0.772  | 5.345                                                        | 0.00    | 1.786  | 8.903  | 2.802                                                                          | 0.00    | 1.222  | 4.383 |
| Haiti               | -2.833                                                                             | 0.10    | -6.179 | 0.514  | 5.571                                                        | 0.00    | 1.953  | 9.189  | 2.738                                                                          | 0.00    | 1.154  | 4.322 |
| Honduras            | -3.027                                                                             | 0.08    | -6.378 | 0.325  | 5.986                                                        | 0.00    | 2.267  | 9.705  | 2.960                                                                          | 0.00    | 1.321  | 4.599 |
| Jamaica             | -2.546                                                                             | 0.13    | -5.851 | 0.759  | 5.267                                                        | 0.01    | 1.680  | 8.854  | 2.721                                                                          | 0.00    | 1.154  | 4.288 |
| Mexico              | -2.662                                                                             | 0.12    | -6.029 | 0.705  | 5.400                                                        | 0.01    | 1.658  | 9.142  | 2.728                                                                          | 0.00    | 0.959  | 4.516 |
| Nicaragua           | -2.555                                                                             | 0.13    | -5.869 | 0.758  | 5.270                                                        | 0.01    | 1.681  | 8.858  | 2.714                                                                          | 0.00    | 1.135  | 4.293 |
| Panama              | -1.908                                                                             | 0.22    | -5.023 | 1.208  | 3.654                                                        | 0.04    | 0.157  | 7.151  | 1.746                                                                          | 0.07    | -0.114 | 3.606 |
| Paraguay            | -1.857                                                                             | 0.33    | -5.657 | 1.944  | 4.316                                                        | 0.04    | 0.258  | 8.375  | 2.459                                                                          | 0.00    | 0.873  | 4.046 |
| Peru                | -2.254                                                                             | 0.20    | -5.746 | 1.237  | 5.266                                                        | 0.02    | 0.994  | 9.539  | 3.012                                                                          | 0.00    | 1.121  | 4.903 |
| Trinidad and Tobago | -3.153                                                                             | 0.07    | -6.513 | 0.207  | 5.260                                                        | 0.01    | 1.490  | 9.030  | 2.107                                                                          | 0.02    | 0.311  | 3.902 |
| Uruguay             | -2.988                                                                             | 0.06    | -6.040 | 0.065  | 5.584                                                        | 0.00    | 2.618  | 8.551  | 2.596                                                                          | 0.00    | 1.147  | 4.046 |
| Venezuela, RB       | -2.764                                                                             | 0.11    | -6.226 | 0.697  | 4.811                                                        | 0.01    | 1.021  | 8.601  | 2.047                                                                          | 0.01    | 0.609  | 3.484 |

Country fixed effects, year fixed effects and country specific time trends included across each regression. All control variables included in Table 2 regressions (see text) also included. None of these coefficients reported to conserve space.

### Supplementary Appendix Table 3, Jackknife Panel Regressions using Private Credit

Panel regressions estimated using Driscoll Kraay Standard Errors

| Country Omitted     | Democracy with Autocratic Constitution<br>(Dem w/ Aut Const vs. Dem w/ Dem Const ) |         |         |        | Democracy + Amend Constitution<br>(Dem w/ Dem Const vs. Aut) |         |        |        | Dem. + Amend Const. + Democracy with Autocratic Const.<br>(Dem w/ Aut Const vs. Aut) |         |        |       |
|---------------------|------------------------------------------------------------------------------------|---------|---------|--------|--------------------------------------------------------------|---------|--------|--------|--------------------------------------------------------------------------------------|---------|--------|-------|
|                     | Coefficient                                                                        | p-value | 95% CI  |        | Coefficient                                                  | p-value | 95% CI |        | Coefficient                                                                          | p-value | 95% CI |       |
| Argentina           | -9.079                                                                             | 0.00    | -13.414 | -4.744 | 8.083                                                        | 0.00    | 3.398  | 12.769 | -0.996                                                                               | 0.29    | -2.888 | 0.896 |
| Bolivia             | -6.176                                                                             | 0.00    | -9.996  | -2.355 | 4.320                                                        | 0.04    | 0.244  | 8.396  | -1.856                                                                               | 0.08    | -3.918 | 0.207 |
| Brazil              | -6.589                                                                             | 0.00    | -10.039 | -3.138 | 6.103                                                        | 0.01    | 1.806  | 10.400 | -0.486                                                                               | 0.64    | -2.541 | 1.569 |
| Chile               | -7.127                                                                             | 0.00    | -11.372 | -2.882 | 7.355                                                        | 0.00    | 3.642  | 11.068 | 0.228                                                                                | 0.81    | -1.699 | 2.154 |
| Colombia            | -7.216                                                                             | 0.00    | -10.942 | -3.490 | 6.698                                                        | 0.00    | 2.650  | 10.747 | -0.518                                                                               | 0.56    | -2.281 | 1.246 |
| Costa Rica          | -8.088                                                                             | 0.00    | -11.709 | -4.466 | 7.383                                                        | 0.00    | 3.406  | 11.360 | -0.704                                                                               | 0.49    | -2.739 | 1.330 |
| Dominican Republic  | -7.069                                                                             | 0.00    | -11.094 | -3.044 | 5.739                                                        | 0.01    | 1.474  | 10.004 | -1.331                                                                               | 0.14    | -3.123 | 0.462 |
| Ecuador             | -8.355                                                                             | 0.00    | -12.501 | -4.208 | 6.911                                                        | 0.01    | 2.220  | 11.602 | -1.443                                                                               | 0.19    | -3.614 | 0.727 |
| El Salvador         | -9.505                                                                             | 0.00    | -13.797 | -5.213 | 9.022                                                        | 0.00    | 4.643  | 13.402 | -0.483                                                                               | 0.61    | -2.382 | 1.417 |
| Guatemala           | -8.678                                                                             | 0.00    | -12.229 | -5.127 | 7.872                                                        | 0.00    | 3.874  | 11.870 | -0.806                                                                               | 0.44    | -2.897 | 1.286 |
| Guyana              | -7.873                                                                             | 0.00    | -11.641 | -4.105 | 7.000                                                        | 0.00    | 2.982  | 11.018 | -0.873                                                                               | 0.37    | -2.806 | 1.060 |
| Haiti               | -8.126                                                                             | 0.00    | -11.895 | -4.357 | 7.208                                                        | 0.00    | 3.166  | 11.250 | -0.918                                                                               | 0.34    | -2.850 | 1.013 |
| Honduras            | -7.786                                                                             | 0.00    | -11.467 | -4.105 | 6.714                                                        | 0.00    | 2.681  | 10.746 | -1.073                                                                               | 0.28    | -3.038 | 0.892 |
| Jamaica             | -7.879                                                                             | 0.00    | -11.628 | -4.130 | 6.999                                                        | 0.00    | 3.038  | 10.959 | -0.880                                                                               | 0.93    | -2.753 | 0.993 |
| Mexico              | -8.184                                                                             | 0.00    | -11.958 | -4.411 | 7.409                                                        | 0.00    | 3.229  | 11.590 | -0.775                                                                               | 0.44    | -2.762 | 1.212 |
| Nicaragua           | -7.871                                                                             | 0.00    | -11.635 | -4.107 | 6.933                                                        | 0.00    | 2.906  | 10.960 | -0.938                                                                               | 0.33    | -2.861 | 0.985 |
| Panama              | -6.240                                                                             | 0.00    | -10.190 | -2.290 | 4.801                                                        | 0.04    | 0.179  | 9.423  | -1.439                                                                               | 0.31    | -4.242 | 1.365 |
| Paraguay            | -7.403                                                                             | 0.00    | -11.759 | -3.048 | 6.236                                                        | 0.01    | 1.717  | 10.756 | -1.167                                                                               | 0.24    | -3.145 | 0.811 |
| Peru                | -7.730                                                                             | 0.00    | -11.510 | -3.951 | 6.507                                                        | 0.00    | 2.176  | 10.838 | -1.224                                                                               | 0.28    | -3.492 | 1.045 |
| Trinidad and Tobago | -8.301                                                                             | 0.00    | -12.137 | -4.464 | 7.175                                                        | 0.00    | 2.924  | 11.427 | -1.126                                                                               | 0.29    | -3.256 | 1.005 |
| Uruguay             | -10.239                                                                            | 0.00    | -13.501 | -6.977 | 9.638                                                        | 0.00    | 6.398  | 12.877 | -0.601                                                                               | 0.51    | -2.407 | 1.204 |
| Venezuela, RB       | -7.949                                                                             | 0.00    | -11.793 | -4.105 | 6.722                                                        | 0.00    | 2.643  | 10.800 | -1.228                                                                               | 0.21    | -3.153 | 0.698 |

Country fixed effects, year fixed effects and country specific time trends included across each regression. All control variables included in Table 2 regressions (see text) also included. None of these coefficients reported to conserve space.

## Supplementary Appendix Table 4, Jackknife Panel Regressions using Stock Market

Panel regressions estimated using Driscoll Kraay Standard Errors

| Country Omitted     | Democracy with Autocratic Constitution<br>(Dem w/ Aut Const vs. Dem w/ Dem Const ) |         |         |        | Democracy + Amend Constitution<br>(Dem w/ Dem Const vs. Aut) |         |         |        | Dem. + Amend Const. + Democracy with Autocratic Const.<br>(Dem w/ Aut Const vs. Aut) |         |         |        |
|---------------------|------------------------------------------------------------------------------------|---------|---------|--------|--------------------------------------------------------------|---------|---------|--------|--------------------------------------------------------------------------------------|---------|---------|--------|
|                     | Coefficient                                                                        | p-value | 95% CI  |        | Coefficient                                                  | p-value | 95% CI  |        | Coefficient                                                                          | p-value | 95% CI  |        |
| Argentina           | -9.401                                                                             | 0.29    | -27.624 | 8.822  | 10.603                                                       | 0.26    | -8.371  | 29.577 | 1.202                                                                                | 0.86    | -10.182 | 12.586 |
| Bolivia             | -12.862                                                                            | 0.13    | -30.066 | 4.343  | 14.322                                                       | 0.09    | -2.681  | 31.325 | 1.460                                                                                | 0.80    | -10.770 | 13.691 |
| Brazil              | -13.265                                                                            | 0.14    | -31.093 | 4.563  | 13.047                                                       | 0.12    | -3.807  | 29.901 | -0.218                                                                               | 0.97    | -13.325 | 12.889 |
| Chile               | -14.687                                                                            | 0.02    | -26.959 | -2.415 | 2.325                                                        | 0.78    | -14.631 | 19.281 | -12.362                                                                              | 0.05    | -24.685 | -0.039 |
| Colombia            | -17.282                                                                            | 0.13    | -40.207 | 5.644  | 16.815                                                       | 0.07    | -1.679  | 35.309 | -0.466                                                                               | 0.95    | -15.891 | 14.958 |
| Costa Rica          | -13.421                                                                            | 0.13    | -31.069 | 4.227  | 13.941                                                       | 0.10    | -2.946  | 30.829 | 0.520                                                                                | 0.93    | -12.028 | 13.068 |
| Dominican Republic  | -13.871                                                                            | 0.11    | -30.983 | 3.241  | 14.559                                                       | 0.08    | -1.685  | 30.802 | 0.687                                                                                | 0.91    | -11.772 | 13.147 |
| Ecuador             | -11.717                                                                            | 0.21    | -30.476 | 7.041  | 11.646                                                       | 0.32    | -12.169 | 35.461 | -0.071                                                                               | 0.99    | -14.604 | 14.462 |
| El Salvador         | -14.036                                                                            | 0.11    | -31.414 | 3.341  | 14.448                                                       | 0.08    | -2.004  | 30.899 | 0.411                                                                                | 0.95    | -12.354 | 13.177 |
| Guatemala           | -13.859                                                                            | 0.11    | -31.004 | 3.285  | 14.569                                                       | 0.08    | -1.737  | 30.874 | 0.710                                                                                | 0.91    | -11.794 | 13.213 |
| Guyana              | -13.870                                                                            | 0.11    | -31.039 | 3.300  | 14.547                                                       | 0.08    | -1.753  | 30.846 | 0.677                                                                                | 0.91    | -11.830 | 13.183 |
| Haiti               | -13.871                                                                            | 0.11    | -30.983 | 3.241  | 14.559                                                       | 0.08    | -1.685  | 30.802 | 0.687                                                                                | 0.91    | -11.772 | 13.147 |
| Honduras            | -13.871                                                                            | 0.11    | -31.004 | 3.261  | 14.559                                                       | 0.08    | -1.705  | 30.822 | 0.687                                                                                | 0.91    | -11.787 | 13.162 |
| Jamaica             | -13.987                                                                            | 0.10    | -30.892 | 2.917  | 14.864                                                       | 0.05    | -0.169  | 29.896 | 0.876                                                                                | 0.86    | -9.666  | 11.419 |
| Mexico              | -14.973                                                                            | 0.06    | -30.679 | 0.732  | 24.013                                                       | 0.03    | 3.119   | 44.906 | 9.039                                                                                | 0.26    | -7.355  | 25.433 |
| Nicaragua           | -13.871                                                                            | 0.11    | -30.983 | 3.241  | 14.559                                                       | 0.08    | -1.685  | 30.802 | 0.687                                                                                | 0.91    | -11.772 | 13.147 |
| Panama              | -13.050                                                                            | 0.13    | -30.298 | 4.197  | 12.336                                                       | 0.12    | -3.490  | 28.162 | -0.714                                                                               | 0.91    | -13.171 | 11.743 |
| Paraguay            | -13.997                                                                            | 0.11    | -31.560 | 3.566  | 14.808                                                       | 0.08    | -1.830  | 31.446 | 0.811                                                                                | 0.90    | -11.981 | 13.603 |
| Peru                | -16.763                                                                            | 0.27    | -47.839 | 14.313 | 19.697                                                       | 0.12    | -0.545  | 44.846 | 2.934                                                                                | 0.70    | -12.936 | 18.804 |
| Trinidad and Tobago | -12.434                                                                            | 0.12    | -28.551 | 3.683  | 13.865                                                       | 0.05    | -0.193  | 27.924 | 1.431                                                                                | 0.81    | -11.091 | 13.953 |
| Uruguay             | -13.643                                                                            | 0.12    | -31.215 | 3.929  | 15.268                                                       | 0.07    | -1.484  | 32.019 | 1.625                                                                                | 0.79    | -11.302 | 14.551 |
| Venezuela, RB       | -13.534                                                                            | 0.13    | -31.584 | 4.517  | 14.595                                                       | 0.09    | -2.220  | 31.410 | 1.061                                                                                | 0.87    | -11.896 | 14.019 |

Country fixed effects, year fixed effects and country specific time trends included across each regression. All control variables included in Table 2 regressions (see text) also included. None of these coefficients reported to conserve space.

## Supplementary Appendix Table 5, Jackknife Panel Regressions using Financial Reforms

Panel regressions estimated using Driscoll Kraay Standard Errors

| Country Omitted     | Democracy with Autocratic Constitution<br>(Dem w/ Aut Const vs. Dem w/ Dem Const ) |         |        |        | Democracy + Amend Constitution<br>(Dem w/ Dem Const vs. Aut) |         |        |       | Dem. + Amend Const. + Democracy with Autocratic Const.<br>(Dem w/ Aut Const vs. Aut) |         |        |        |
|---------------------|------------------------------------------------------------------------------------|---------|--------|--------|--------------------------------------------------------------|---------|--------|-------|--------------------------------------------------------------------------------------|---------|--------|--------|
|                     | Coefficient                                                                        | p-value | 95% CI |        | Coefficient                                                  | p-value | 95% CI |       | Coefficient                                                                          | p-value | 95% CI |        |
| Argentina           | -1.065                                                                             | 0.01    | -1.826 | -0.303 | 0.730                                                        | 0.04    | 0.050  | 1.410 | -0.334                                                                               | 0.13    | -0.769 | 0.100  |
| Bolivia             | -0.613                                                                             | 0.04    | -1.193 | -0.032 | 0.182                                                        | 0.47    | -0.330 | 0.694 | -0.431                                                                               | 0.05    | -0.852 | -0.010 |
| Brazil              | -0.725                                                                             | 0.02    | -1.321 | -0.130 | 0.313                                                        | 0.30    | -0.288 | 0.914 | -0.412                                                                               | 0.08    | -0.870 | 0.046  |
| Chile               | -0.788                                                                             | 0.01    | -1.363 | -0.212 | 0.698                                                        | 0.04    | 0.022  | 1.375 | -0.089                                                                               | 0.68    | -0.523 | 0.344  |
| Colombia            | -0.486                                                                             | 0.10    | -1.068 | 0.096  | 0.353                                                        | 0.22    | -0.220 | 0.925 | -0.133                                                                               | 0.48    | -0.515 | 0.249  |
| Costa Rica          | -0.827                                                                             | 0.01    | -1.467 | -0.186 | 0.495                                                        | 0.11    | -0.111 | 1.015 | -0.332                                                                               | 0.11    | -0.747 | 0.084  |
| Dominican Republic  | -0.787                                                                             | 0.02    | -1.411 | -0.164 | 0.464                                                        | 0.12    | -0.120 | 1.049 | -0.323                                                                               | 0.12    | -0.740 | 0.094  |
| Ecuador             | -1.105                                                                             | 0.01    | -1.855 | -0.355 | 0.662                                                        | 0.06    | -0.019 | 1.344 | -0.443                                                                               | 0.07    | -0.917 | 0.031  |
| El Salvador         | -0.578                                                                             | 0.08    | -1.124 | 0.080  | 0.111                                                        | 0.73    | -0.531 | 0.753 | -0.467                                                                               | 0.02    | -0.861 | -0.072 |
| Guatemala           | -0.927                                                                             | 0.01    | -1.622 | -0.231 | 0.638                                                        | 0.05    | 0.013  | 1.264 | -0.288                                                                               | 0.19    | -0.728 | 0.152  |
| Guyana              | -0.842                                                                             | 0.01    | -1.472 | -0.213 | 0.501                                                        | 0.09    | -0.090 | 1.093 | -0.341                                                                               | 0.10    | -0.756 | 0.074  |
| Haiti               | -0.842                                                                             | 0.01    | -1.472 | -0.213 | 0.501                                                        | 0.09    | -0.090 | 1.093 | -0.341                                                                               | 0.10    | -0.756 | 0.074  |
| Honduras            | -0.842                                                                             | 0.01    | -1.372 | -0.213 | 0.501                                                        | 0.09    | -0.090 | 1.093 | -0.341                                                                               | 0.10    | -0.756 | 0.074  |
| Jamaica             | -0.845                                                                             | 0.01    | -1.495 | -0.194 | 0.523                                                        | 0.09    | -0.095 | 1.140 | -0.322                                                                               | 0.13    | -0.744 | 0.100  |
| Mexico              | -0.823                                                                             | 0.01    | -1.467 | -0.179 | 0.027                                                        | 0.92    | -0.527 | 0.581 | -0.796                                                                               | 0.00    | -1.186 | -0.405 |
| Nicaragua           | -0.888                                                                             | 0.01    | -1.496 | -0.279 | 0.590                                                        | 0.05    | -0.001 | 1.181 | -0.297                                                                               | 0.17    | -0.724 | 0.129  |
| Panama              | -0.842                                                                             | 0.01    | -1.472 | -0.213 | 0.501                                                        | 0.09    | -0.090 | 1.093 | -0.341                                                                               | 0.10    | -0.756 | 0.074  |
| Paraguay            | -1.176                                                                             | 0.00    | -1.929 | -0.422 | 0.983                                                        | 0.01    | 0.272  | 1.694 | -0.193                                                                               | 0.33    | -0.587 | 0.201  |
| Peru                | -1.235                                                                             | 0.00    | -1.852 | -0.617 | 1.081                                                        | 0.01    | 0.300  | 1.862 | -0.153                                                                               | 0.57    | -0.702 | 0.395  |
| Trinidad and Tobago | -0.842                                                                             | 0.01    | -1.472 | -0.213 | 0.501                                                        | 0.09    | -0.090 | 1.093 | -0.341                                                                               | 0.10    | -0.756 | 0.074  |
| Uruguay             | -0.588                                                                             | 0.07    | -1.226 | 0.050  | 0.192                                                        | 0.54    | -0.436 | 0.820 | -0.396                                                                               | 0.07    | -0.821 | 0.030  |
| Venezuela, RB       | -0.824                                                                             | 0.01    | -1.454 | -0.194 | 0.473                                                        | 0.12    | -0.121 | 1.066 | -0.351                                                                               | 0.10    | -0.772 | 0.069  |

Country fixed effects, year fixed effects and country specific time trends included across each regression. All control variables included in Table 2 regressions (see text) also included. None of these coefficients reported to conserve space.
